# Supplementary material for: Evaluation of novel surfactants for plant transformation
Source: PubMed Central journal article supplement (PMC9733262; doi:10.1186/s13104-022-06251-5), 2022-12-08

# PCR verification of transformation

## Silwet L-77

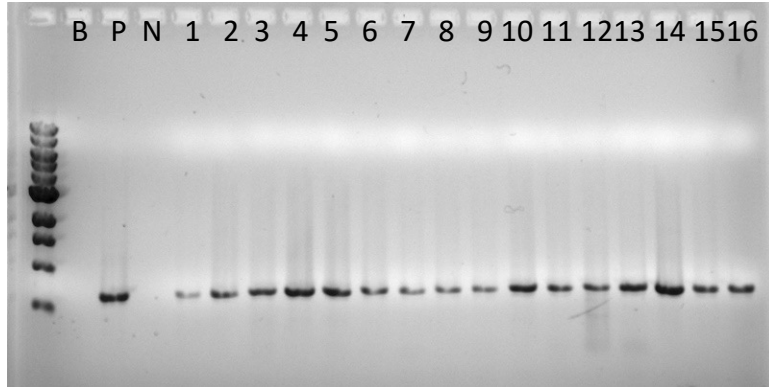

## OE446

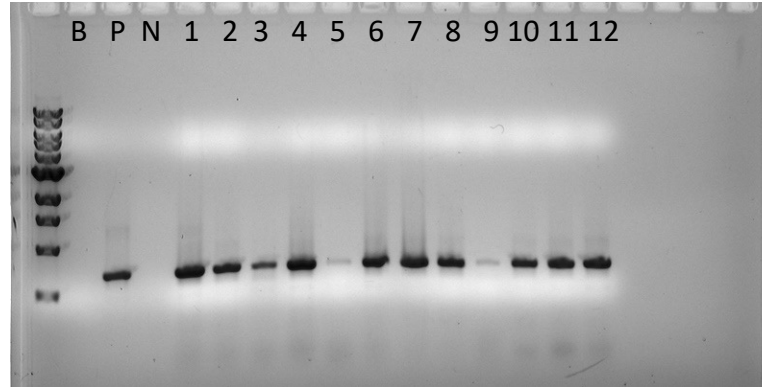

Thermocycler conditions:

94oC 2 min (1 cycle)

94oC 30 sec

57oC 30 sec

72oC 30 sec

Primers:

NPTII F57 5' GATTGAACAAGATGGATTGCACGC

NPTII R58 5' CCACAGTCGATGAATCCAGAAAAGC

Amplicon size 628 bp

## S200

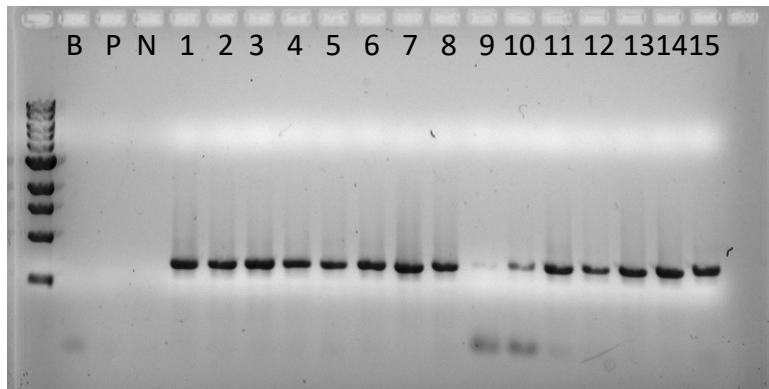

## S233

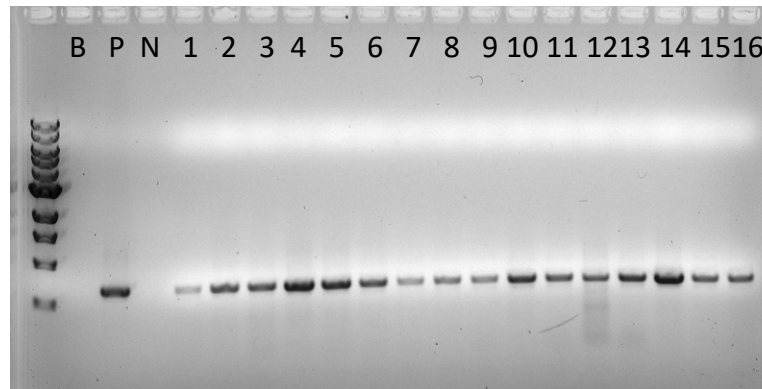

# PCR verification of transformation

## S240

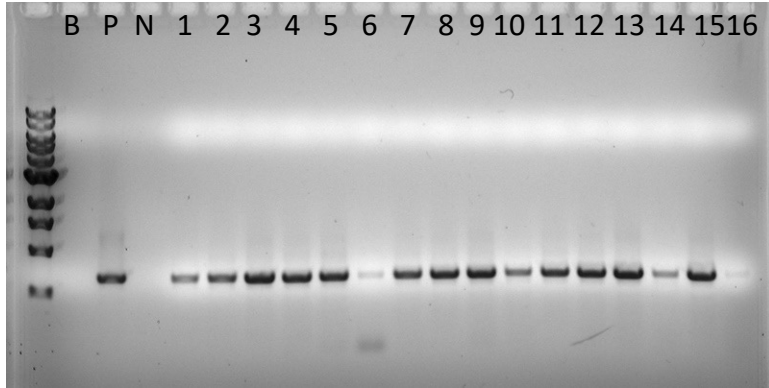

## S279

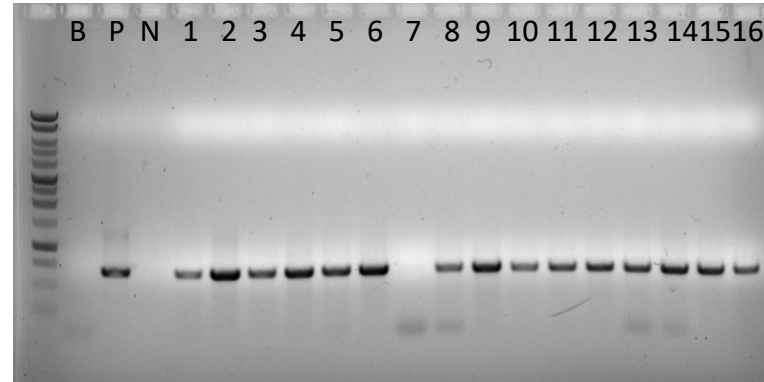

Thermocycler conditions:

94oC 2 min (1 cycle)

94oC 30 sec

57oC 30 sec

72oC 30 sec

Primers:

NPTII F57 5' GATTGAACAAGATGGATTGCACGC

NPTII R58 5' CCACAGTCGATGAATCCAGAAAAGC

Amplicon size 628 bp

## S301

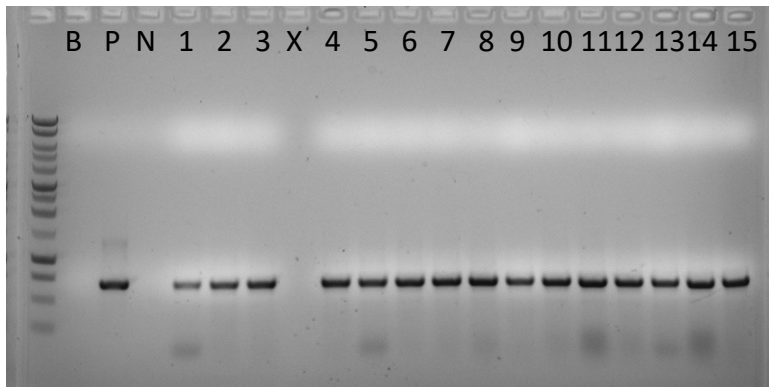

## SP133

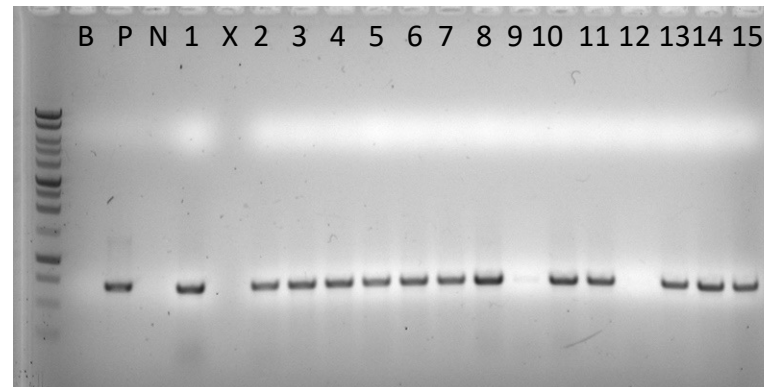

Supplement: 13104_2022_6251_MOESM2_ESM.pdf [file 13104_2022_6251_MOESM2_ESM.pdf]
